# Supplementary material for: Structural Insights into the PorK and PorN Components of the Porphyromonas gingivalis Type IX Secretion System
Source: PLOS journal article supplement (doi:10.1371/journal.ppat.1005820), 2016-08-10
Supplement: S3 (10.1371/journal.ppat.1005820.s003) [file journal.ppat.1005820.s003]

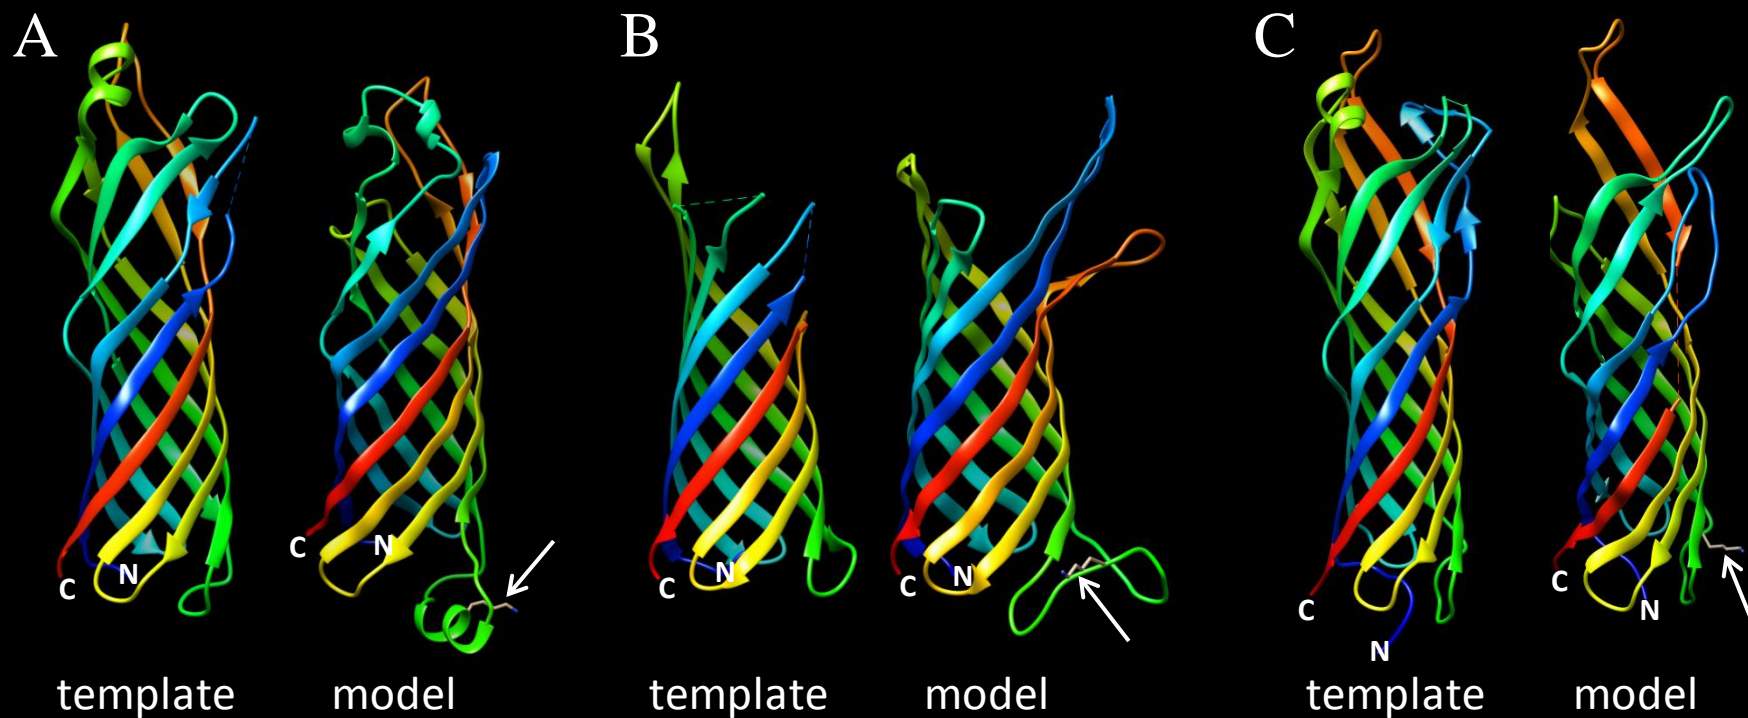

### S3 Figure: Molecular modelling of PG0189 using Phyre-2.

Three models are shown based on the three best matching (but different) template structures. A) OmpW full length from *E. coli*, PDB accession 2F1T; B) OmpA trans-membrane domain from *E. coli*, PDB accession 1QJP; C) OprG full length from *P. aeruginosa*, PDB accession 2X27. The N- and C-termini are shown and the cross-linked lysine residue is indicated by an arrow.
